# Supplementary material for: Analysis of tumorigenesis and immunological role of LTBP2: a potential predictor for immunotherapy
Source: Research Square preprint supplement (doi:10.21203/rs.3.rs-3933887/v1), 2024-02-21
Supplement: Supplementary file 1 [file 295873fb3cdc2d50a794b866.xlsx]

## Sheet: Sheet1
TCGA-ACC	Adrenocortical carcinoma	肾上腺皮质癌
TCGA-BLCA	Bladder Urothelial Carcinoma	膀胱尿路上皮癌
TCGA-BRCA	Breast invasive carcinoma	乳腺浸润癌
TCGA-CESC	Cervical squamous cell carcinoma and endocervical adenocarcinoma	宫颈鳞癌和腺癌
TCGA-CHOL	Cholangiocarcinoma	胆管癌
TCGA-COAD	Colon adenocarcinoma	结肠癌
TCGA-COADREAD	Colon adenocarcinoma/Rectum adenocarcinoma Esophageal carcinoma	结直肠癌
TCGA-DLBC	Lymphoid Neoplasm Diffuse Large B-cell Lymphoma	弥漫性大B细胞淋巴瘤
TCGA-ESCA	Esophageal carcinoma	食管癌
TCGA-FPPP	FFPE Pilot Phase II	FFPE试点二期
TCGA-GBM	Glioblastoma multiforme	多形成性胶质细胞瘤
TCGA-GBMLGG	Glioma	胶质瘤
TCGA-HNSC	Head and Neck squamous cell carcinoma	头颈鳞状细胞癌
TCGA-KICH	Kidney Chromophobe	肾嫌色细胞癌
TCGA-KIPAN	Pan-kidney cohort (KICH+KIRC+KIRP)	混合肾癌
TCGA-KIRC	Kidney renal clear cell carcinoma	肾透明细胞癌
TCGA-KIRP	Kidney renal papillary cell carcinoma	肾乳头状细胞癌
TCGA-LAML	Acute Myeloid Leukemia	急性髓细胞样白血病
TCGA-LGG	Brain Lower Grade Glioma	脑低级别胶质瘤
TCGA-LIHC	Liver hepatocellular carcinoma	肝细胞肝癌
TCGA-LUAD	Lung adenocarcinoma	肺腺癌
TCGA-LUSC	Lung squamous cell carcinoma	肺鳞癌
TCGA-MESO	Mesothelioma	间皮瘤
TCGA-OV	Ovarian serous cystadenocarcinoma	卵巢浆液性囊腺癌
TCGA-PAAD	Pancreatic adenocarcinoma	胰腺癌
TCGA-PCPG	Pheochromocytoma and Paraganglioma	嗜铬细胞瘤和副神经节瘤
TCGA-PRAD	Prostate adenocarcinoma	前列腺癌
TCGA-READ	Rectum adenocarcinoma	直肠腺癌
TCGA-SARC	Sarcoma	肉瘤
TCGA-STAD	Stomach adenocarcinoma	胃癌
TCGA-SKCM	Skin Cutaneous Melanoma	黑色素瘤
TCGA-STES	Stomach and Esophageal carcinoma	胃和食管癌
TCGA-TGCT	Testicular Germ Cell Tumors	睾丸癌
TCGA-THCA	Thyroid carcinoma	甲状腺癌
TCGA-THYM	Thymoma	胸腺癌
TCGA-UCEC	Uterine Corpus Endometrial Carcinoma	子宫内膜癌
TCGA-UCS	Uterine Carcinosarcoma	子宫肉瘤
TCGA-UVM	Uveal Melanoma	葡萄膜黑色素瘤
TARGET-OS	Osteosarcoma	骨肉瘤
TARGET-ALL	Acute Lymphoblastic Leukemia	白血病
TARGET-NB	Neuroblastoma	神经母细胞瘤
TARGET-WT	High-Risk Wilms Tumor	肾母细胞瘤
