# Supplementary material for: Analysis of tumorigenesis and immunological role of LTBP2: a potential predictor for immunotherapy
Source: Research Square preprint supplement (doi:10.21203/rs.3.rs-3933887/v1), 2024-02-21
Supplement: Supplementary file 2 [file 599188a76d0481ab4e3403b5.xlsx]

## Sheet: table_similar-GEPIA
Gene Symbol	Gene ID	PCC
COL8A1	ENSG00000144810.15	0.58
KIAA1217	ENSG00000120549.15	0.51
HEG1	ENSG00000173706.12	0.51
ITGBL1	ENSG00000198542.13	0.5
COL8A2	ENSG00000171812.10	0.5
MXRA5	ENSG00000101825.7	0.49
DOCK9	ENSG00000088387.17	0.47
ZFP36L1	ENSG00000185650.9	0.47
SUSD6	ENSG00000100647.7	0.47
PDGFRL	ENSG00000104213.12	0.46
CDH11	ENSG00000140937.13	0.45
FNDC1	ENSG00000164694.16	0.45
ANTXR1	ENSG00000169604.19	0.44
COL6A3	ENSG00000163359.15	0.44
WBP1L	ENSG00000166272.16	0.44
GXYLT2	ENSG00000172986.12	0.44
CNN2	ENSG00000064666.14	0.44
PDGFRB	ENSG00000113721.13	0.43
FN1	ENSG00000115414.18	0.43
MXRA8	ENSG00000162576.16	0.43
MYOF	ENSG00000138119.16	0.43
GGT5	ENSG00000099998.17	0.43
CTGF	ENSG00000118523.5	0.42
PTRF	ENSG00000177469.12	0.42
ECE1	ENSG00000117298.14	0.42
NOD1	ENSG00000106100.10	0.42
FBN1	ENSG00000166147.13	0.42
CYBRD1	ENSG00000071967.11	0.41
RBMS2	ENSG00000076067.11	0.41
PODN	ENSG00000174348.13	0.41
FAP	ENSG00000078098.13	0.4
ACVR1	ENSG00000115170.13	0.4
RP3-449M8.6	ENSG00000259005.1	0.4
PRICKLE1	ENSG00000139174.10	0.4
ITGA9	ENSG00000144668.11	0.4
PDE5A	ENSG00000138735.15	0.4
ADAMTS12	ENSG00000151388.10	0.4
TMEM43	ENSG00000170876.7	0.4
MMP2	ENSG00000087245.12	0.39
MRC2	ENSG00000011028.13	0.39
PLXDC2	ENSG00000120594.16	0.39
LCA5	ENSG00000135338.13	0.39
COL5A2	ENSG00000204262.11	0.39
PLS3	ENSG00000102024.17	0.39
SFRP2	ENSG00000145423.4	0.39
RASA1	ENSG00000145715.14	0.39
PDGFC	ENSG00000145431.10	0.39
THBS2	ENSG00000186340.14	0.39
SHE	ENSG00000169291.9	0.38
ISLR	ENSG00000129009.12	0.38
